# Supplementary material for: Highly Conductive Halide Na-ion Conductor Boosted by Low-cost Aliovalent Polyanion Substitution for All-Solid-State Sodium Batteries
Source: Research Square preprint supplement (doi:10.21203/rs.3.rs-7754741/v1), 2025-11-04
Supplement: Supplementary file 1 [file 5afab370a01c8ff5aa3fe820.docx]

[Supplementary Information]

**Highly Conductive Halide Na-ion Conductor Boosted by Low-cost Aliovalent Polyanion Substitution for All-Solid-State Sodium Batteries**

Xiaolin Guoa, Man Chena, James Burrow,b Santosh Thapa,c Mahadeen Nashiru,b Thoms Marchese,b  Badri Narayanan,a Yan Chen,e Yang-Tse Cheng,c,d Shirley Meng,b,* Hui Wang a,*

a Mechanical Engineering Department, University of Louisville, Louisville, KY 40292, USA

b Pritzker School of Molecular Engineering, The University of Chicago, Chicago, Illinois 60637, United States

c Department of Physics and Astronomy, University of Kentucky, Lexgington, KY, 40506, USA

d Department of Chemical and Materials Engineering, University of Kentucky, Lexington, KY, 40506, USA

e Neutron Scattering Division, Oak Ridge National Laboratory, Oak Ridge, TN 37830, USA

* Corresponding authors: [hui.wang.1@louisville.edu](mailto:hui.wang.1@louisville.edu); [shirleymeng@uchicago.edu](mailto:shirleymeng@uchicago.edu)

**
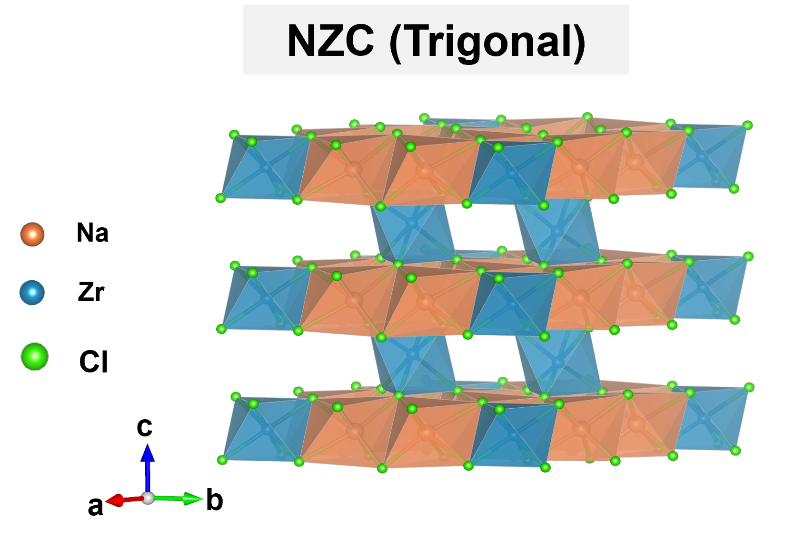
**

**Supplementary Fig. 1** Scheme of crystal structure for trigonal NZC.

**
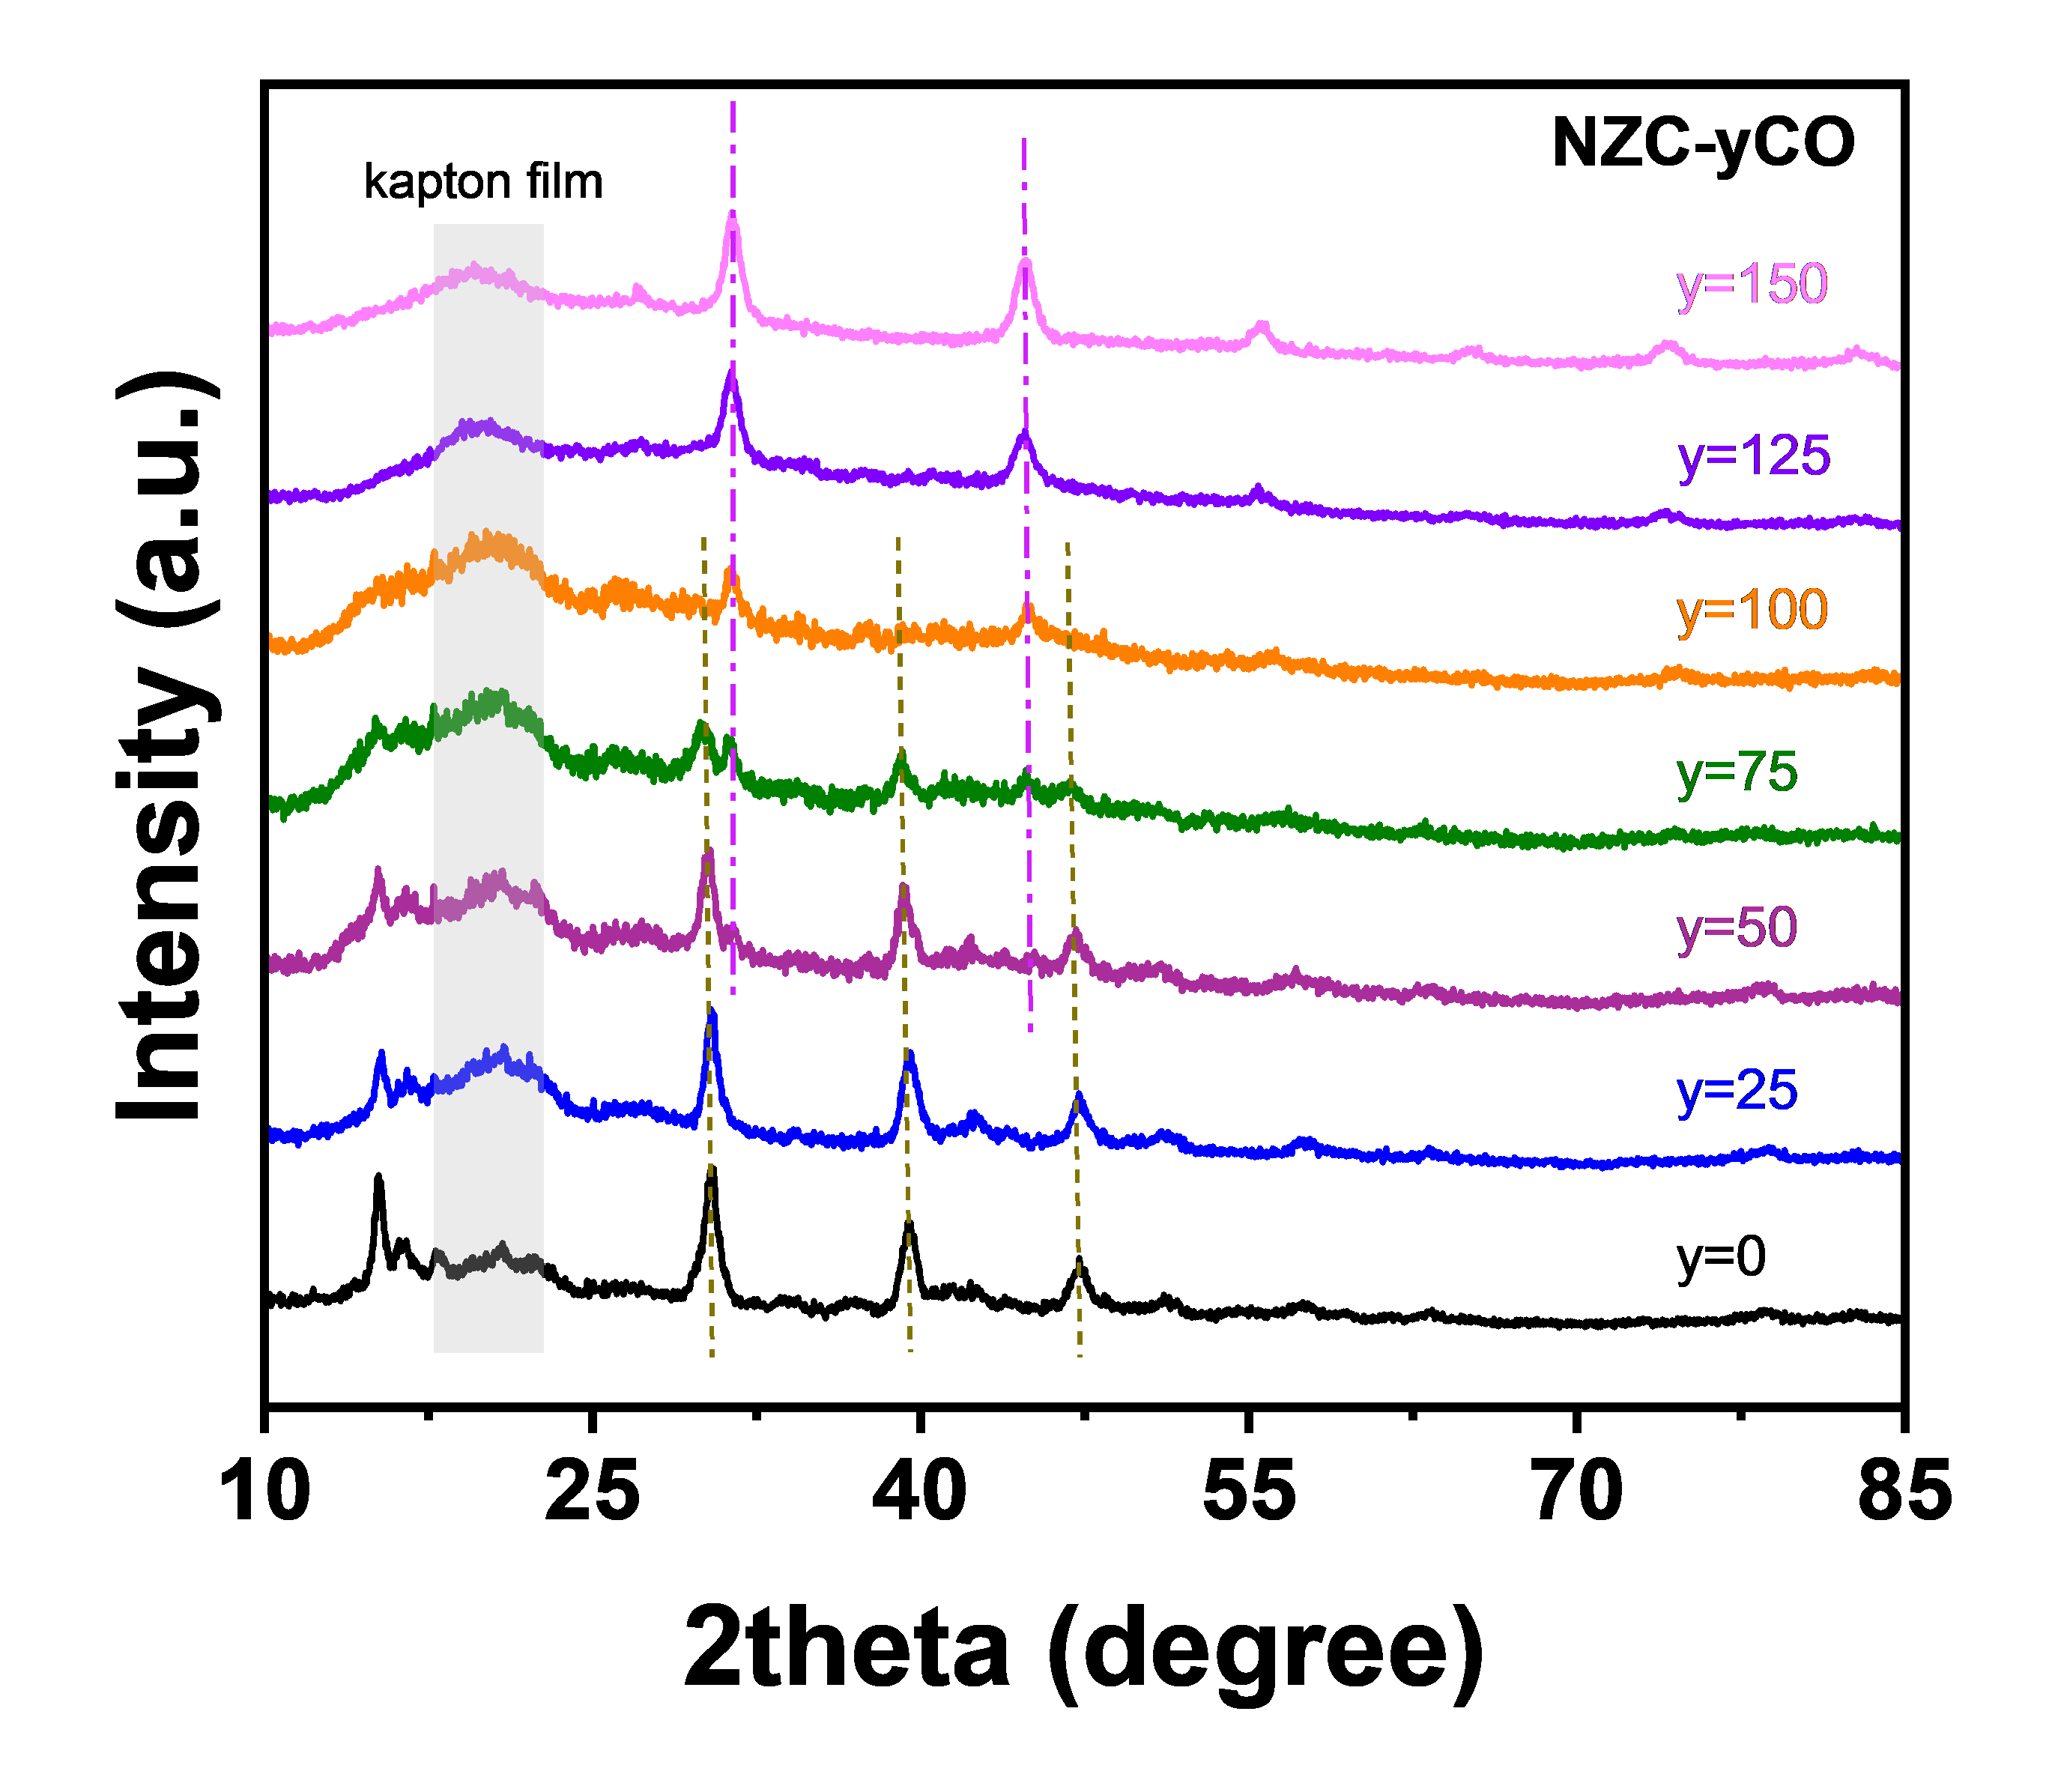
**

**Supplementary Fig. 2** The XRD pattern of NZC-yCO (0≤y≤150) with lab X-ray diffractometer with the wavelength of Cu Kα (λ=1.5416Å).


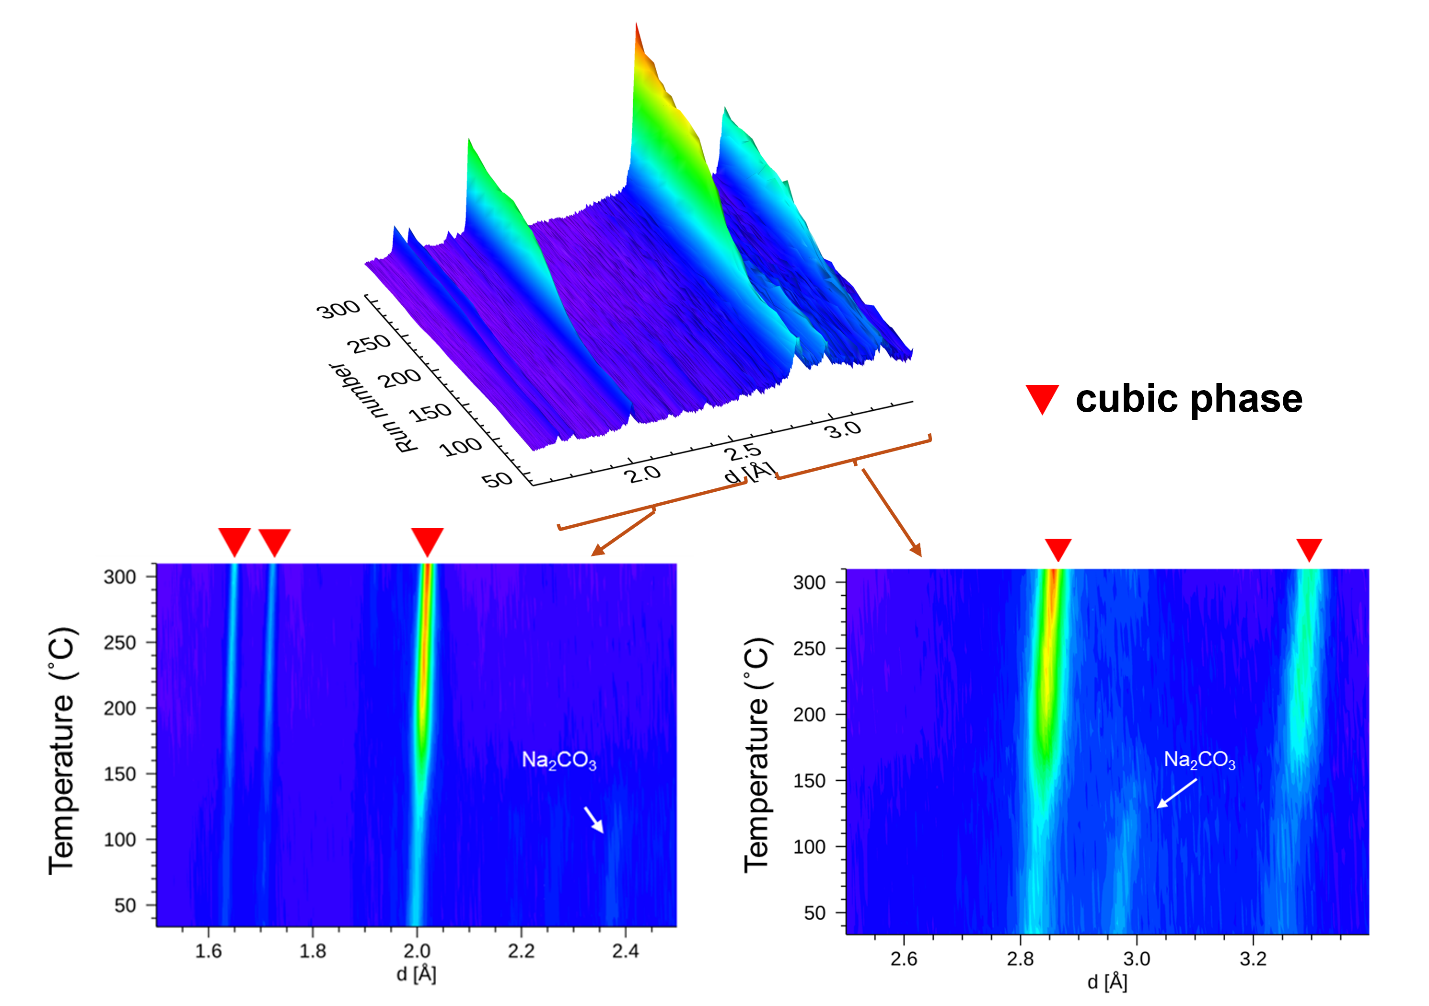


**Supplementary Fig. 3** In-situ neutron diffraction pattern of NZC-100CO sample from room temperature to 300 °C.


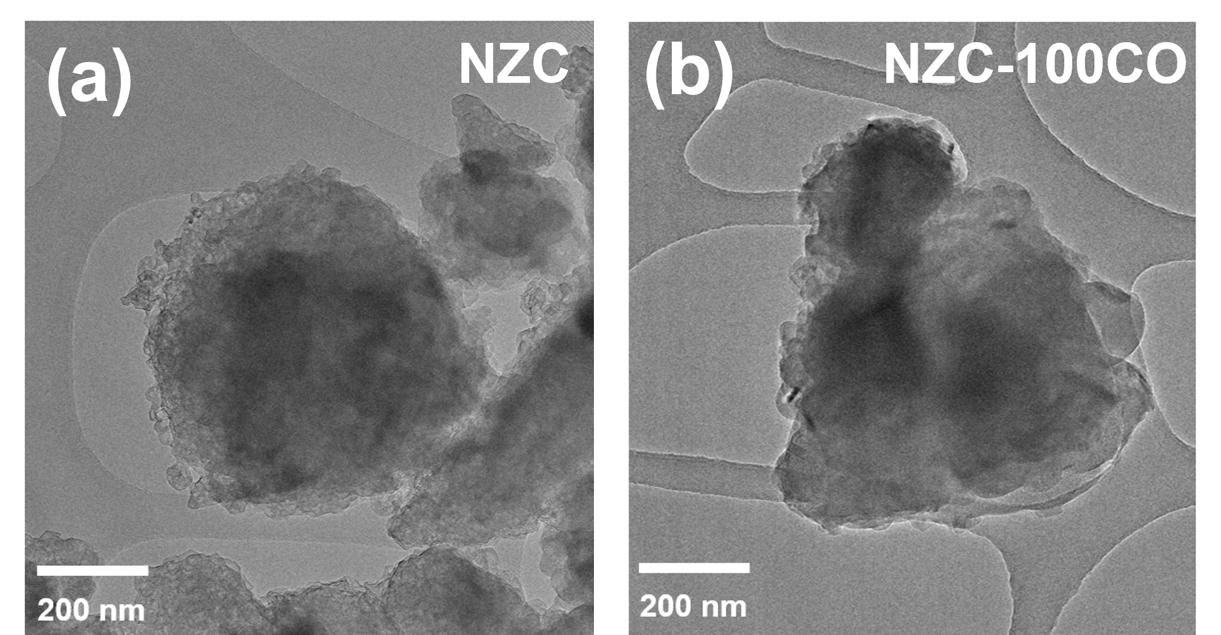


**Supplementary Fig. 4** TEM images of (a) NZC and (b) NZC-100CO.


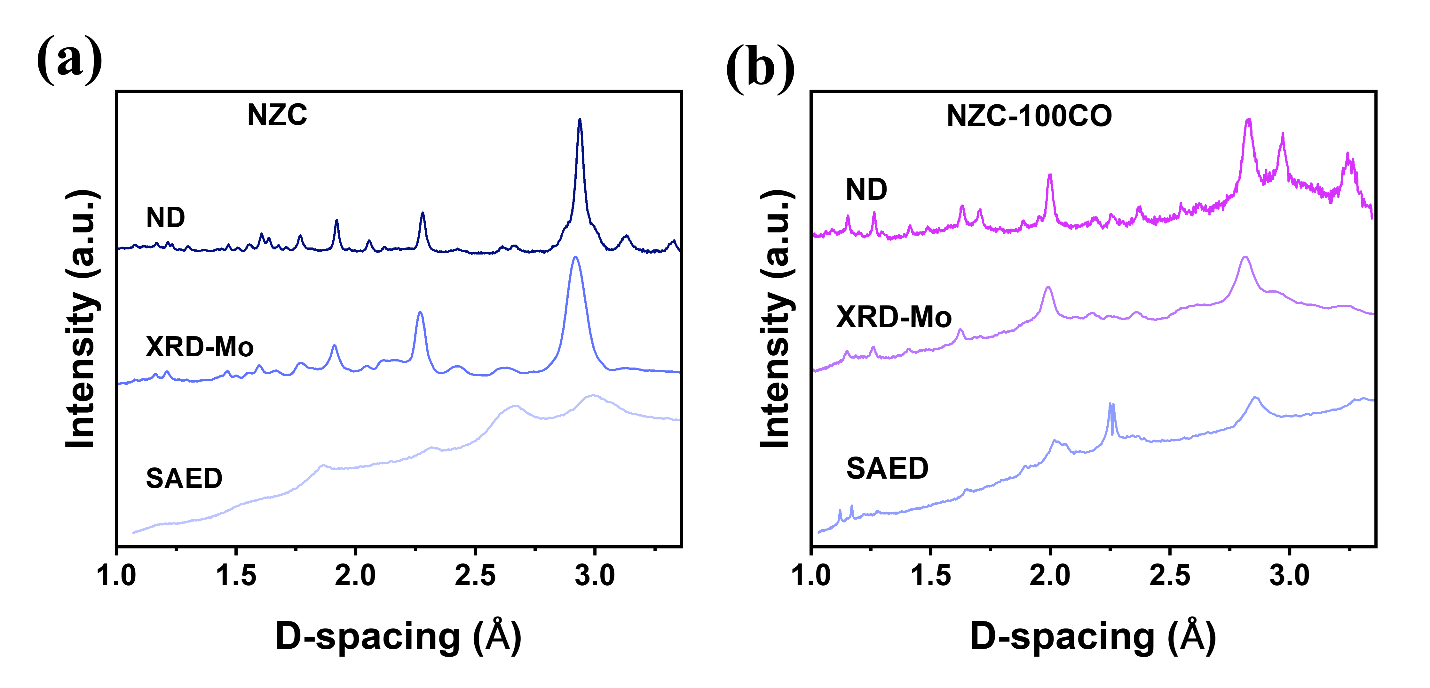


**Supplementary Fig. 5** The XRD pattern with Mo source (λ=0.71Å), neutron diffraction (ND) patterns and selected area electron diffraction (SAED) results of (a) NZC and (b) NZC-100CO.


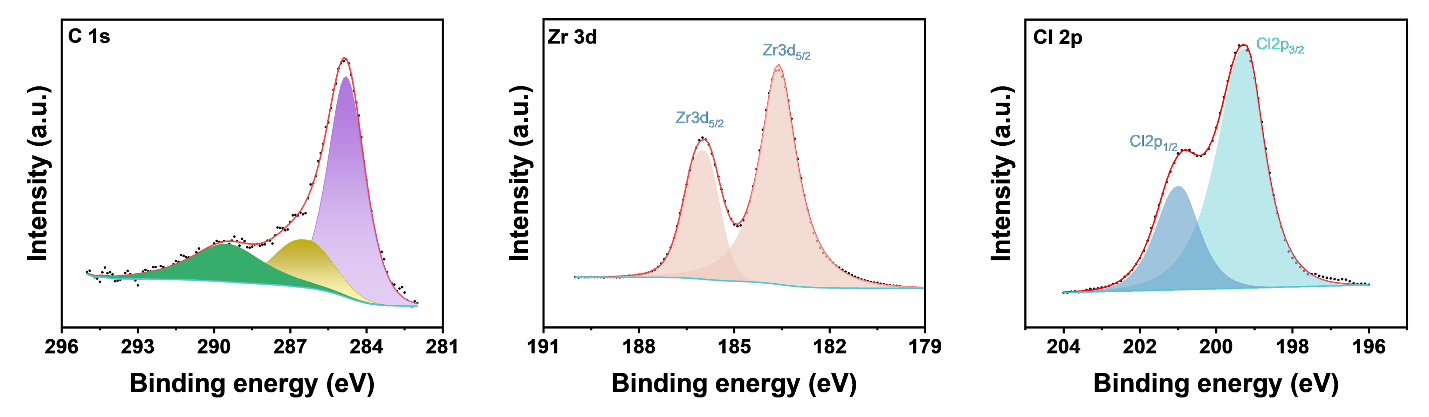


**Supplementary Fig. 6** XPS spectra of NZC (a) C 1s, (b) Zr 3d, (c) Cl 2p.


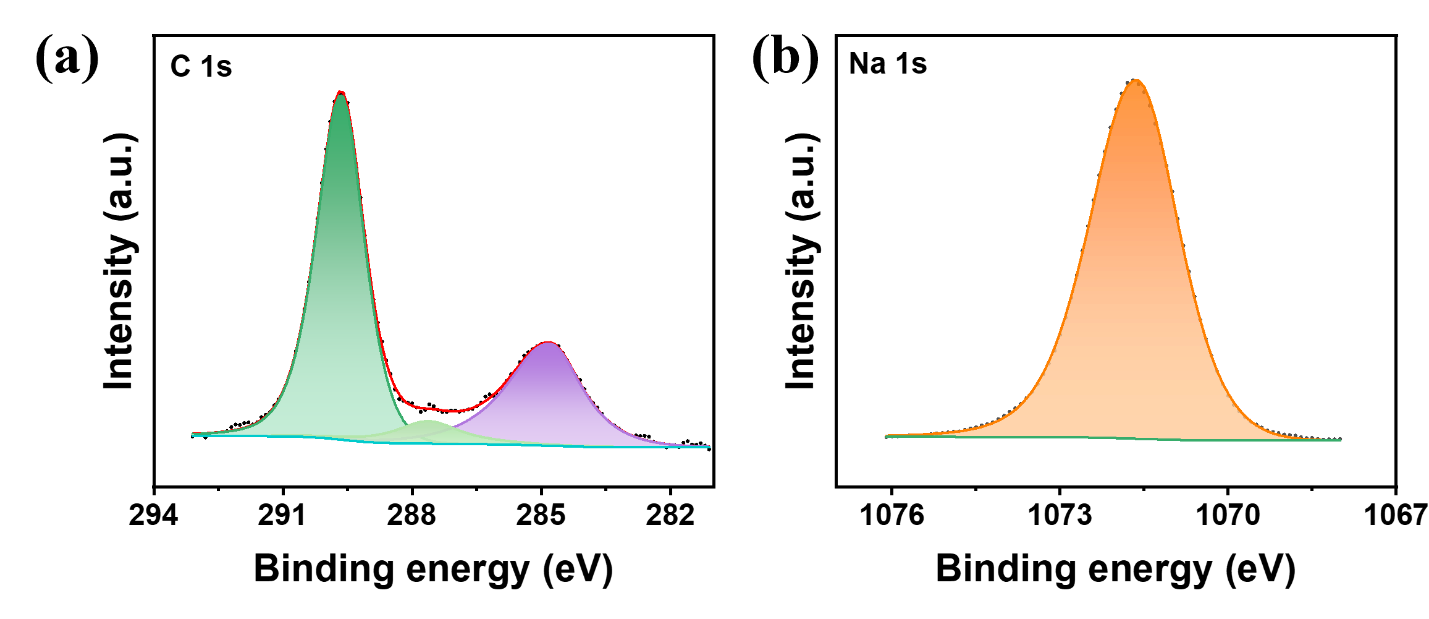


**Supplementary Fig. 7** XPS spectra of Na2CO3 (a) C 1s and (b) Na 1s.


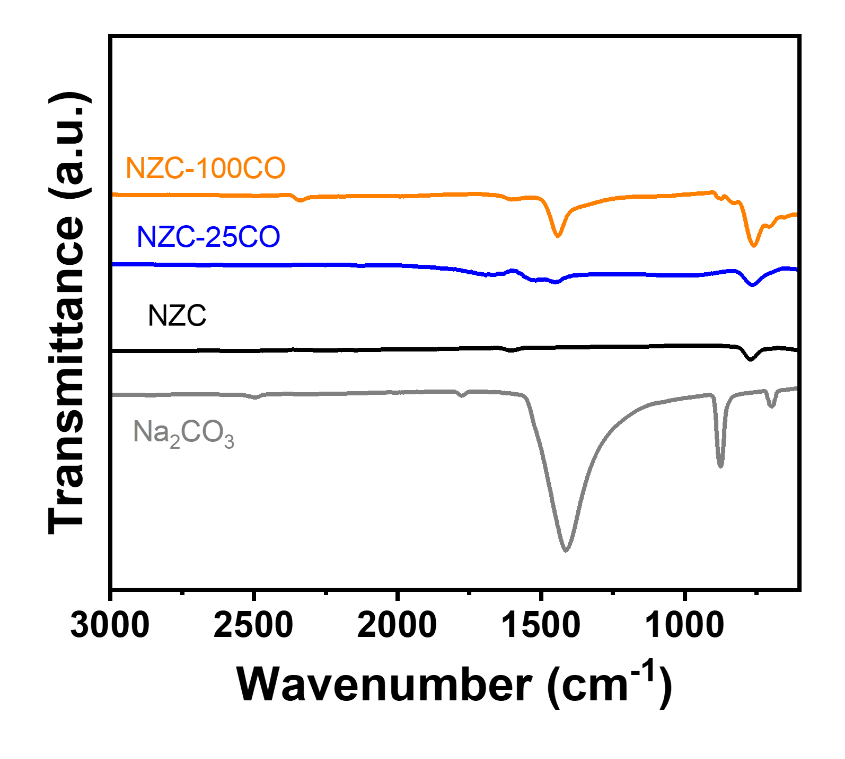


**Supplementary Fig. 8** FTIR spectra of NZC-*y*CO samples (y=25, 100), NZC and Na2CO3 as reference.


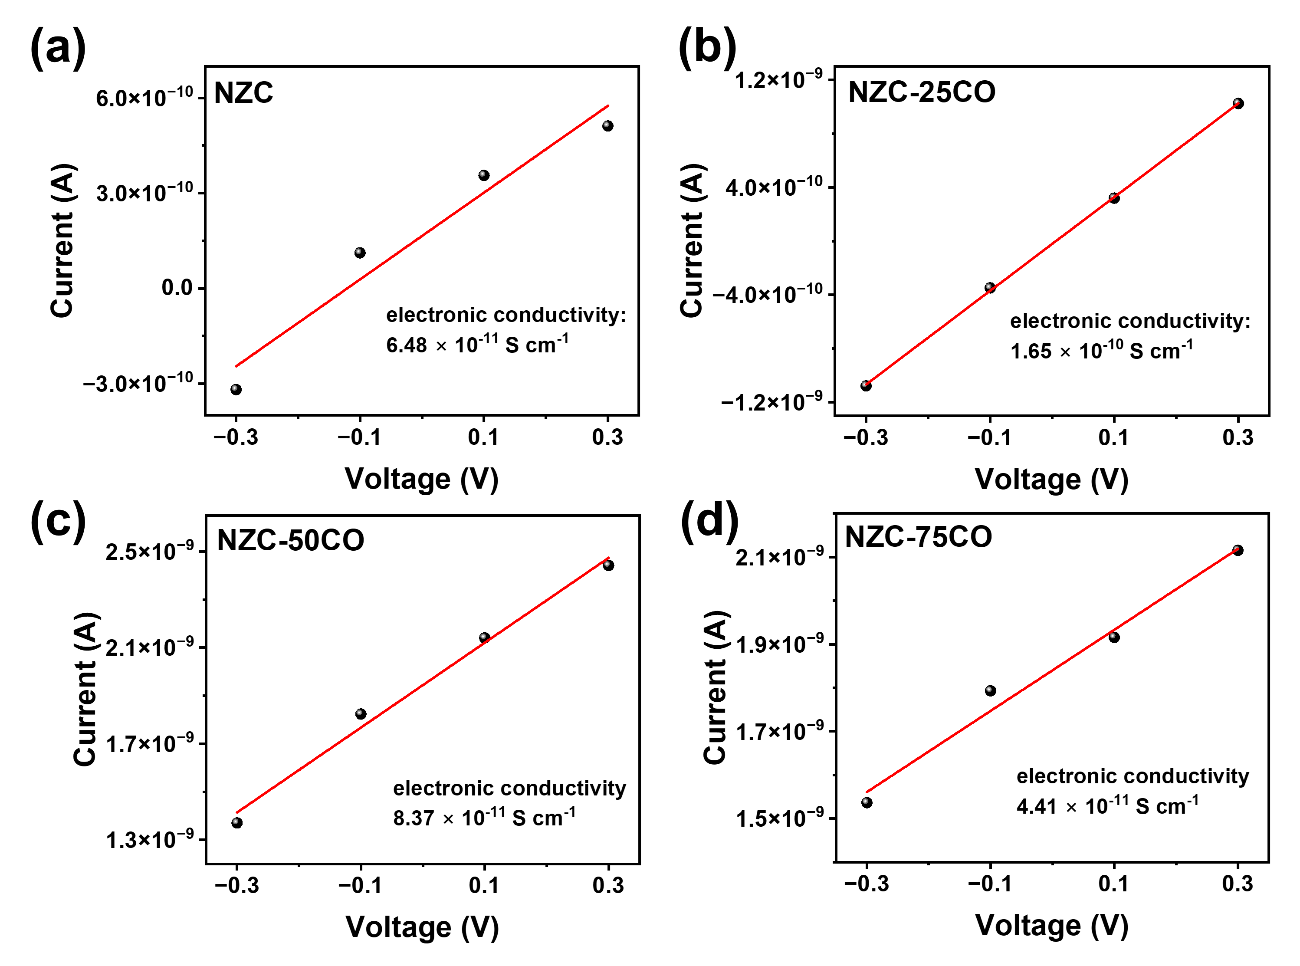


**Supplementary Fig. 9** Electronic conductivity measurements for (a) NZC, (b) NZC-25CO, (c) NZC-50CO and (d) NZC-75CO samples.


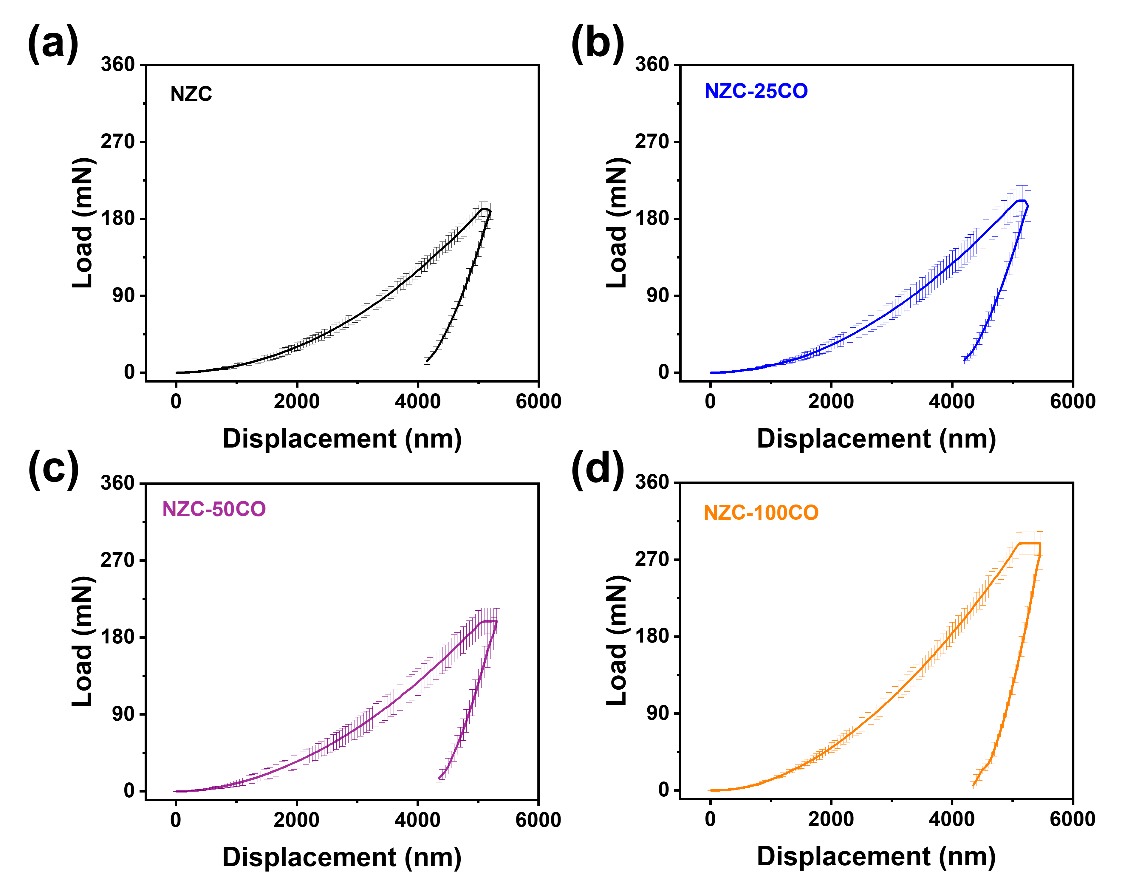


**Supplementary Fig. 10** The load-displacement curves of (a) NZC, (b) NZC-25CO, (c) NZC-50CO and (d) NZC-100CO by nanoindentation measurement.


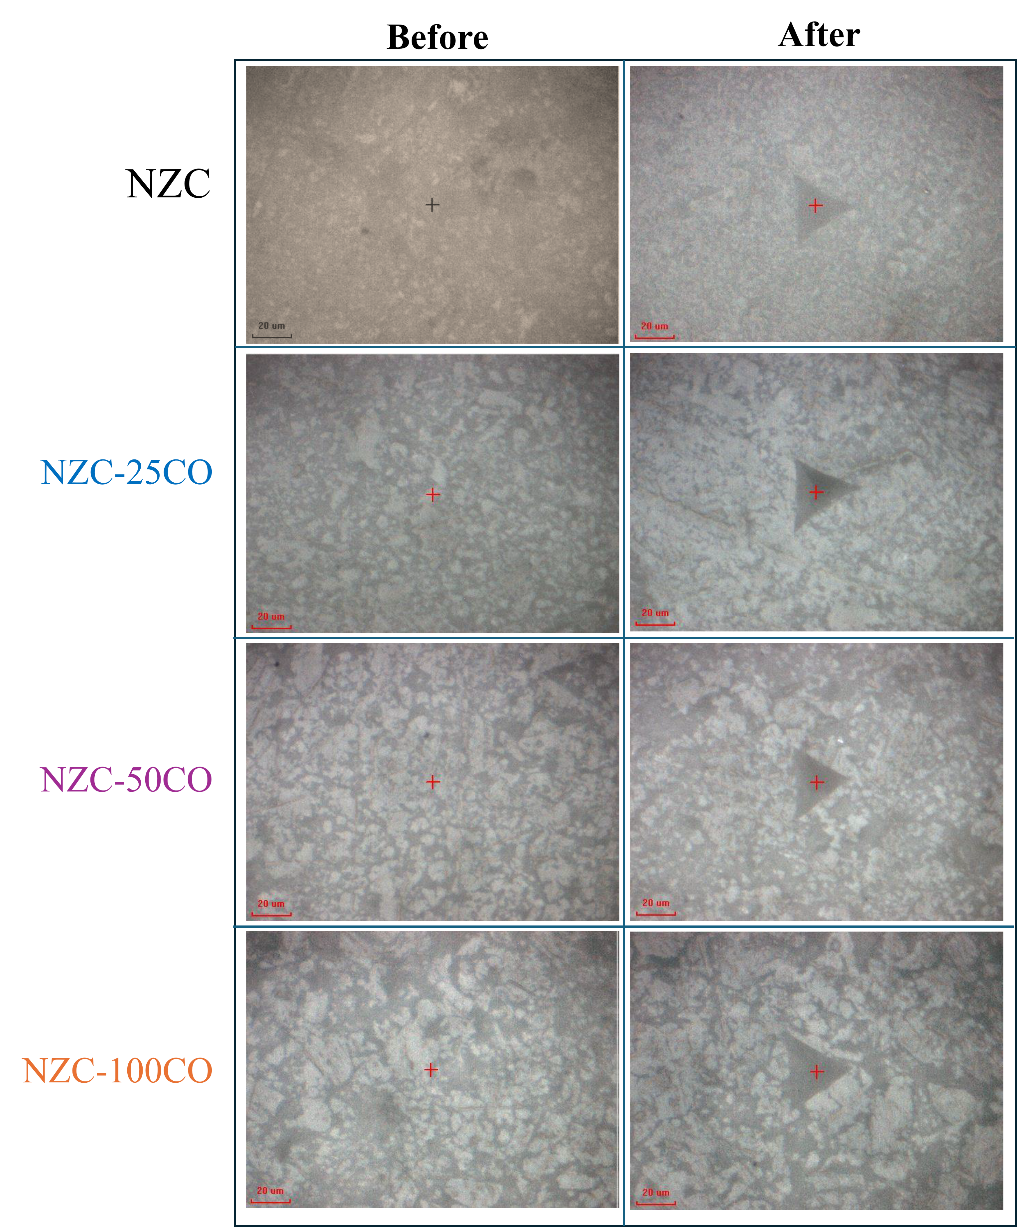


**Supplementary Fig. 11** Optical images of (a) NZC, (b) NZC-25CO, (c) NZC-50CO and (d) NZC-75CO before and after nanoindentation in the magnification of 50X.


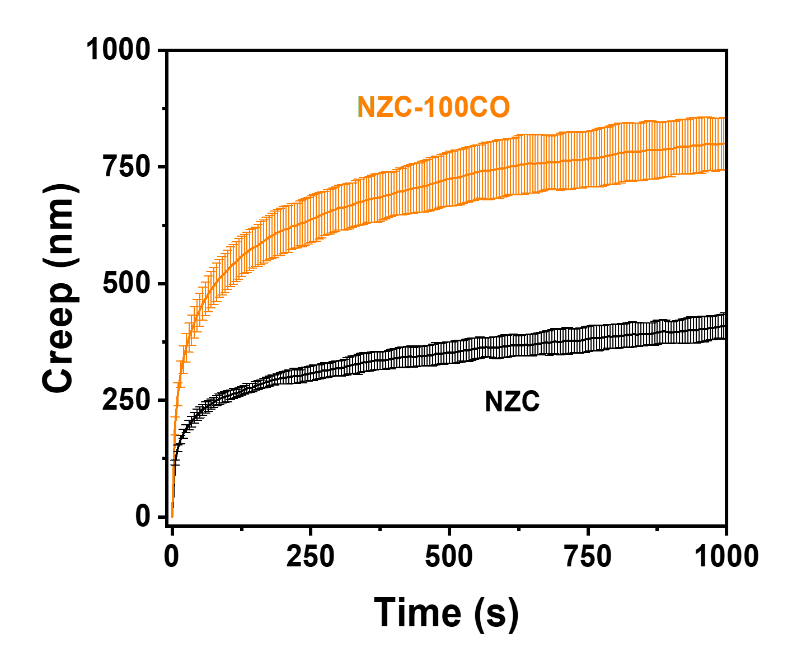


**Supplementary Fig. 12** Creep curves of NZC and NZC-100CO.


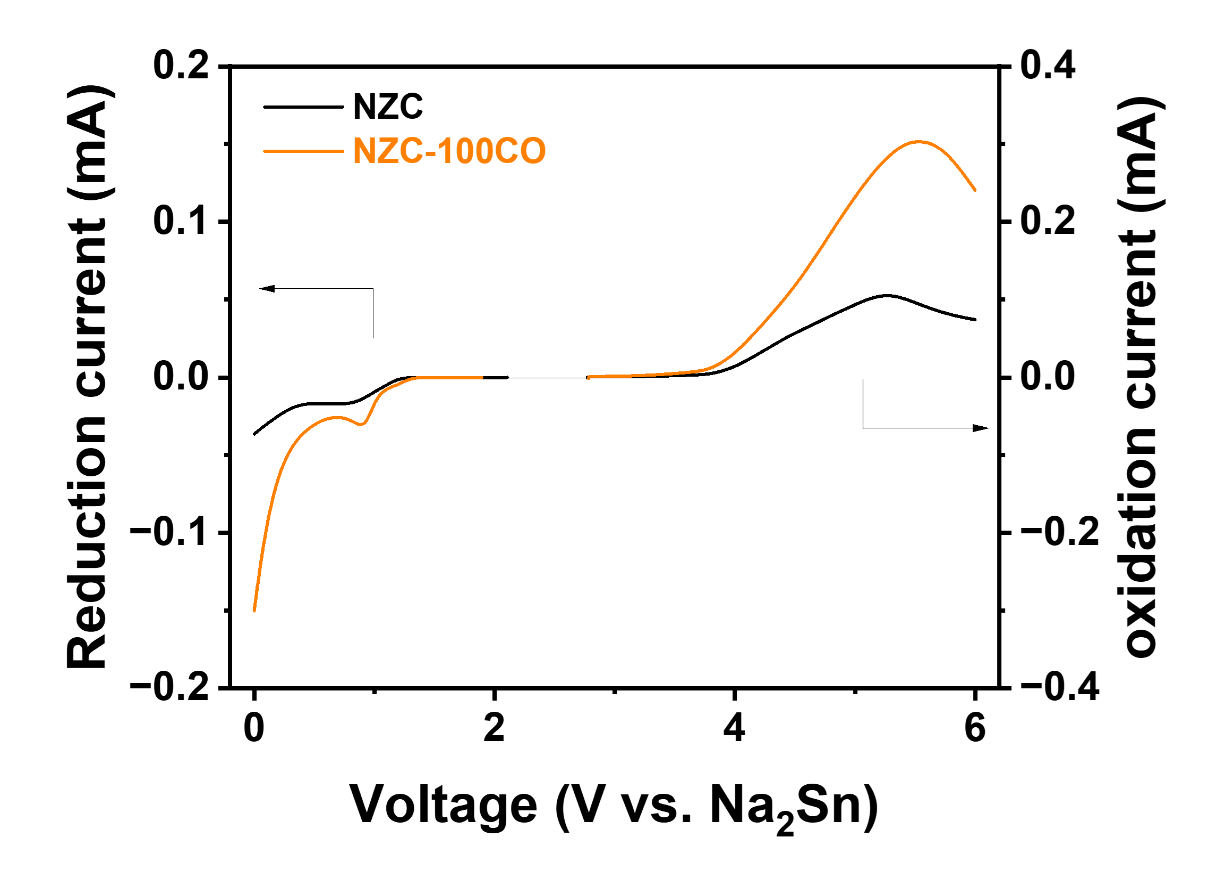


**Supplementary Fig. 13** Oxidation and reduction linear sweep voltammetry curves for NZC and NZC-100CO solid electrolytes.


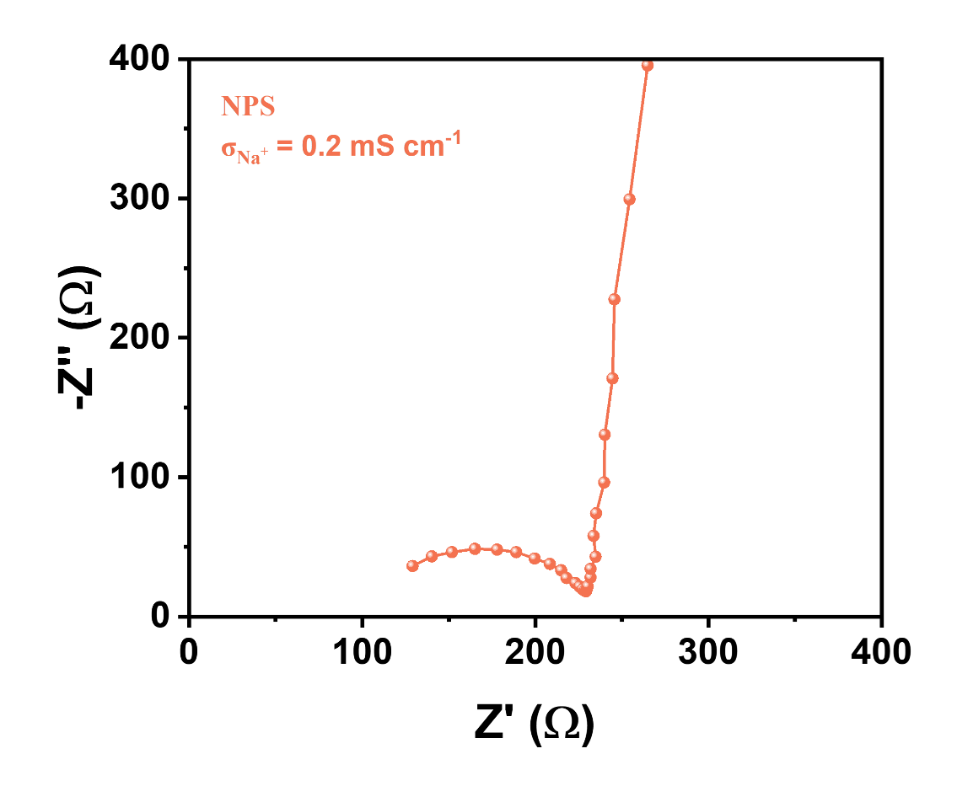


**Supplementary Fig. 14** Nyquist plot of synthesized NPS at room temperature.


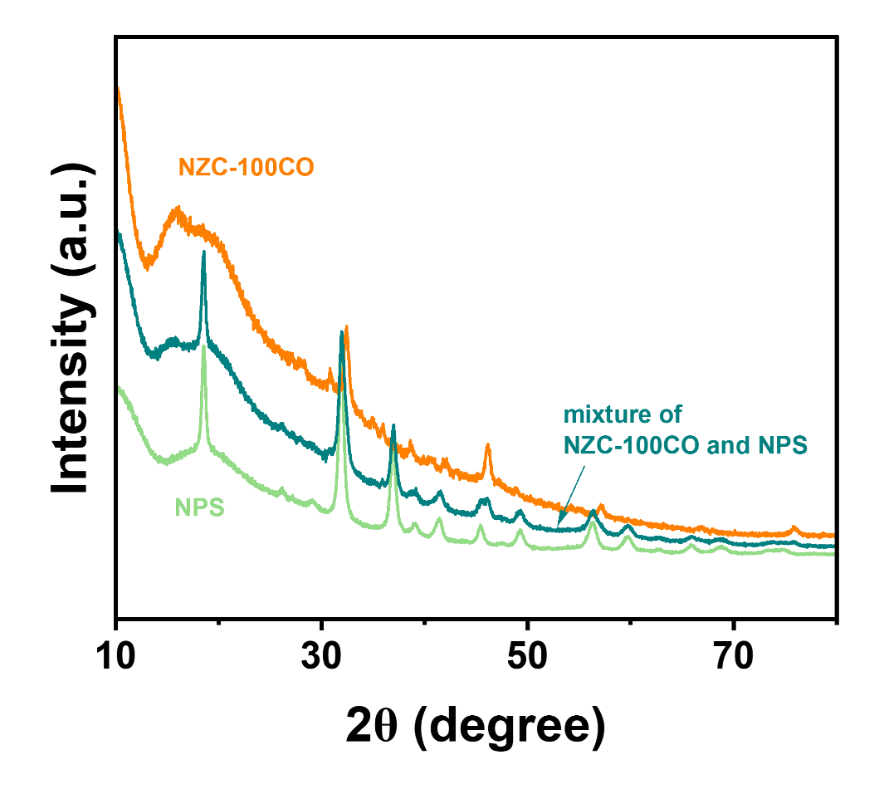


**Supplementary Fig. 15** XRD pattern of the mixture of NPS and NZC-100CO, and NPS, NZC-100CO, respectively.


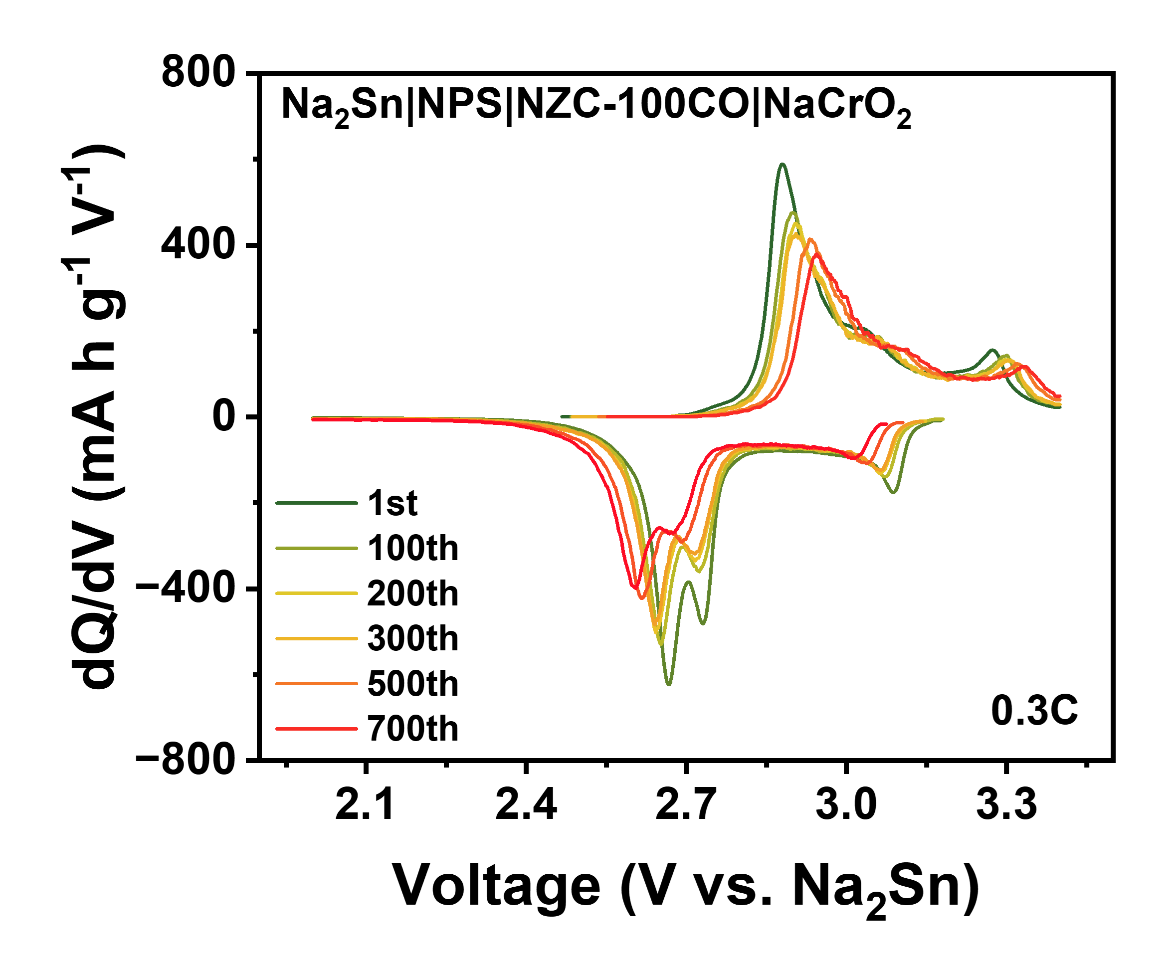


**Supplementary Fig. 16** The differential capacity vs voltage curves of ASSB with NZC-100CO SE at 1st, 100th, 200th, 300th, 500th and 700th cycles, respectively.

**Supplementary** Table 1 Rietveld refinement result of NZC-100CO from Neutron diffraction.

| Composition: NaCl-Na2CO3-ZrCl4 | | | | |  | | | | | | | | |
| --- | --- | --- | --- | --- | --- | --- | --- | --- | --- | --- | --- | --- | --- |
| Phase I: cubic, Fmm (225) | | | | |  | | | | | | | | |
| Lattice parameters: *a* = *b* = *c* = 5.6451(5) Å, *α* = *β* = *γ* = 90˚ V = 179.902 Å3 | | | | | | | | | | | | | |
| atom | Wyck symbol | | x | | y | | | | z | Occupancy | | | Uiso |
| Na | 4b | | 0 | | 0 | | | | 0 | 1 | | | 0.019(2) |
| Cl | 4a | | 0.5 | | 0.5 | | | | 0.5 | 1 | | | 0.019(2) |
| Phase II: Na2CO3, monoclinic, 1 2/m1 (12) | | | | | | |  | | | | | | |
| Lattice parameters: *a* = 8.9087 (9) Å, *b* =5.2408 (1) Å, *c* = 6.0493(2) Å, *α* = *γ* = 90˚, *β* = 101.19(6) ˚ | | | | | | | | | | | | | |
| atom | | Wyck symbol | | x | | y | | z | | | occupancy | Uiso | |
| Na | | 2a | | 0 | | 0 | | 0 | | | 1 | 0.054(0) | |
| Na | | 2c | | 0 | | 0 | | 0.5 | | | 1 | 0.054(0) | |
| Na | | 4i | | 0.1703(6) | | 0.5 | | 0.7481(6) | | | 1 | 0.054(0) | |
| C | | 4i | | 0.5 | | 0.5 | | 0.2492(0) | | | 1 | 0.054(0) | |
| O | | 8j | | 0.1017(8) | | 0.2942(3) | | 0.2855(7) | | | 1 | 0.054(0) | |
| O | | 4i | | 0.2898(6) | | 0.5 | | 0.1776(0) | | | 1 | 0.054(0) | |

**Supplementary** Table 2. Bulk price calculation of precursors for synthesis halide solid electrolyte. Reagent grade prices are used for the calculation and the bulk prices are below.

| Chemical | Item number | Quantity (g) | Price ($) | Unit price ($/kg) |
| --- | --- | --- | --- | --- |
| ZrCl4  (Fisher Scientific) | AC206410050 | 5 | 68.7 | 13740 |
| AC206411000 | 100 | 76.65 | 766.5 |
| AC206415000 | 500 | 340.5 | 681 |
| AC206410025 | 2500 | 1218 | 487.2 |
| Estimated bulk prices | 1000000 | - | **12.2682** |
| AlCl3  (Thermo Fisher Scientific) | 012298-30 | 250 | 39.4 | 157.6 |
| 012298-A1 | 1000 | 60.65 | 60.65 |
| 012298-D9 | 5000 | 238.65 | 47.73 |
| Estimated bulk prices | 1000000 | - | **5.2822** |
| ErCl3  (Thermo Fisher Scientific) | 089917-09 | 10 | 90.2 | 9020 |
| 089917-18 | 50 | 367 | 7340 |
| Estimated bulk prices | 1000000 | - | **2064.9522** |
| YCl3  (Thermo Fisher Scientific) | 018682-09 | 10 | 80.65 | 8065 |
| 018682-18 | 50 | 232.65 | 4653 |
| 018682-30 | 250 | 806.65 | 3226.6 |
| Estimated bulk prices | 1000000 | - | **295.3181** |
| SmCl3  (Thermo Fisher Scientific) | 089916-09 | 10 | 115.65 | 11565 |
| 089916-18 | 50 | 453.65 | 9073 |
| Estimated bulk prices | 1000000 | - | **2037.9335** |
| TaCl5  (Thermo Fisher Scientific) | 014164-06 | 5 | 44.65 | 8930 |
| 014164-14 | 25 | 145.65 | 5826 |
| 014164-22 | 100 | 423.65 | 4236.5 |
| Estimated bulk price | 1000000 | - | **422.1823** |
| CrCl3  (Thermo Fisher Scientific) | 012336-18 | 50 | 83 | 1660 |
| 012336-30 | 250 | 259.65 | 1038.6 |
| Estimated bulk price | 1000000 | - | **92.6659** |
| YbCl3  (Thermo Fisher Scientific) | 040653-06 | 5 | 134.65 | 26930 |
| 040653-14 | 25 | 552.65 | 22106 |
| Estimated bulk price | 1000000 | - | **6026.4284** |
| NbCl5  (Thermo Fisher Scientific) | 011548-14 | 25 | 85.65 | 3426 |
| 011548-22 | 100 | 169.65 | 1696.5 |
| 011548-36 | 500 | 702.65 | 1405.3 |
| Estimated bulk price | 1000000 | - | **138.9313** |
| LaCl3  (Thermo Fisher Scientific) | 087911-06 | 5 | 39.65 | 7930 |
| 087911-14 | 25 | 132.65 | 5306 |
| 087911-22 | 100 | 466.65 | 4666.5 |
| Estimated bulk price | 1000000 | - | **861.2317** |
| HfCl4  (Fisher Scientific) | AA1183488 | 2.5 | 25.25 | 10100 |
| AA1183412 | 25 | 85.6 | 3424 |
| AA1183422 | 100 | 288 | 2880 |
| Estimated bulk price | 1000000 | - | **98.5054** |
| ZrF4  (Fisher Scientific) | AA1154214 | 25 | 62.6 | 2504 |
| AA1154222 | 100 | 229.5 | 2295 |
| Estimated bulk price | 1000000 | - | **1286.1748** |
| Nb2O5  (Thermo Fisher Scientific) | 011365-22 | 100 | 95.65 | 956.5 |
| 011365-36 | 500 | 407.65 | 815.3 |
| 011365-A3 | 2000 | 1461.65 | 730.825 |
| Estimated bulk price | 1000000 | - | **415.2790** |
| Na2O2  (Thermo Fisher Scientific) | 33384-09 | 10 | 24.8 | 2480 |
| 33384-22 | 100 | 107.65 | 1076.5 |
| 33384-36 | 500 | 357.65 | 715.3 |
| Estimated bulk price | 1000000 | - | **59.9639** |
| NaF  (Fisher Scientific) | AAA1301930 | 250 | 57.1 | 228.4 |
| AAA130190B | 1000 | 113.4 | 113.4 |
| AAA130190I | 5000 | 380 | 76 |
| Estimated bulk price | 1000000 | - | **10.4078** |
| Na2O  (Thermo Fisher Scientific) | 036712-14 | 25 | 79.65 | 3186 |
| 036712-22 | 100 | 255.65 | 2556.5 |
| Estimated bulk price | 1000000 | - | **592.2158** |
| NaOH  (Thermo Fisher Scientific) | 424330250 | 25 | 44.65 | 1786 |
| 424335000 | 500 | 76.1 | 152.2 |
| 424330010 | 1000 | 145 | 145 |
| 424330025 | 2500 | 153.65 | 61.46 |
| 424330100 | 10000 | 400.65 | 40.065 |
| Estimated bulk price | 1000000 | - | **1.5336** |
| NaCl  (Thermo Fisher Scientific) | 012314-36 | 500 | 49.65 | 99.3 |
| 012314-A3 | 2000 | 70.65 | 35.325 |
| 012314-A9 | 10000 | 161.65 | 16.165 |
| Estimated bulk price | 1000000 | - | **0.9488** |
| Na2CO3  (Thermo Fisher Scientific) | L13098-36 | 500 | 39.65 | 79.3 |
| L13098-0E | 2500 | 71.65 | 28.66 |
| L13098-0I | 5000 | 111.65 | 22,33 |
| Estimated bulk price | 1000000 | - | **1.0565** |

Table S3. The cost of sodium-based halide SEs calculation

|  | 2.4 NaCl | + | 0.4 ErCl3 | + | 0.6 ZrCl4 | → | **Na2.4Er0.4Zr0.6Cl6** |
| --- | --- | --- | --- | --- | --- | --- | --- |
|  | 140.255446 |  | 109.443600 |  | 139.814400 |  | 389.513446 |
| Mass (g) | 360.078574 |  | 280.975153 |  | 358.946273 |  | 1000 |
| Unit price ($/kg) | 0.9488 |  | 2064.9522 |  | 12.2682 |  |  |
| Sum | 0.341643 |  | 580.200259 |  | 4.403625 |  | **584.946 $/kg** |
|  |  |  |  |  |  |  |  |
|  | 2.25 NaCl | + | 0.75 ZrCl4 | + | 0.25 YCl3 | → | **Na2.25Y0.25Zr0.75Cl6** |
|  | 131.489481 |  | 174.768000 |  | 48.813960 |  | 355.071441 |
| Mass (g) | 370.318380 |  | 492.205173 |  | 137.476447 |  | 1000 |
| Unit price ($/kg) | 0.948800 |  | 12.268200 |  | 295.318100 |  |  |
| Sum | 0.351358 |  | 6.038472 |  | 40.599283 |  | **46.989 $/kg** |
|  |  |  |  |  |  |  |  |
|  | NaCl | + | AlCl3 | | → | | **NaAlCl4** |
|  | 58.439769 |  | 133.331539 |  |  |  | 191.771308 |
| Mass (g) | 304.736772 |  | 695.263228 |  |  |  | 1000 |
| Unit price ($/kg) | 0.948800 |  | 5.282200 |  |  |  |  |
| Sum | 0.289134 |  | 3.672519 |  |  |  | **3.962 $/kg** |
|  |  |  |  |  |  |  |  |
|  | 0.845NaCl | + | 1.085SmCl3 | + | 0.38TaCl5 | → | **0.62Na0.75Sm1.75Cl6·**  **0.38NaTaCl6** |
|  | 49.381605 |  | 278.530350 |  | 136.115194 |  | 464.027149 |
| Mass (g) | 106.419646 |  | 600.245805 |  | 293.334549 |  | 1000 |
| Unit price ($/kg) | 0.948800 |  | 2037.933500 |  | 422.182300 |  |  |
| Sum | 0.100971 |  | 1223.261035 |  | 123.840654 |  | **1347.203 $/kg** |
|  |  |  |  |  |  |  |  |
|  | 0.8575 NaCl | + | 0.9975 LaCl3 | + | 0.43 TaCl5 | → | **0.57Na0.75La1.75Cl6·**  **0.43NaTaCl6** |
|  | 50.112102 |  | 244.642331 |  | 154.025088 |  | 448.779522 |
| Mass (g) | 111.663077 |  | 545.128107 |  | 343.208816 |  | 1000 |
| Unit price ($/kg) | 0.948800 |  | 861.231700 |  | 422.182300 |  |  |
| Sum | 0.105946 |  | 469.481607 |  | 144.896687 |  | **614.484 $/kg** |
|  |  |  |  |  |  |  |  |
|  | 2.25 NaCl | + | 0.25 YbCl3 | + | 0.75 ZrCl4 | → | **Na2.25Yb0.25Zr0.75Cl6** |
|  | 131.489481 |  | 69.851000 |  | 174.768000 |  | 376.108481 |
| Mass (g) | 349.605201 |  | 185.720353 |  | 464.674446 |  | 1000 |
| Unit price ($/kg) | 0.948800 |  | 6026.428400 |  | 12.268200 |  |  |
| Sum | 0.331705 |  | 1119.230412 |  | 5.700719 |  | **1125.263 $/kg** |
|  |  |  |  |  |  |  |  |
|  | 0.61 NaCl | + | 0.39 ZrCl4 | + | Na2O | → | **0.13ZrO2-0.61NaCl-0.26Na2ZrCl6** |
|  | 35.648259 |  | 90.879360 |  | 16.114420 |  | 142.642039 |
| Mass (g) | 249.914117 |  | 637.114840 |  | 112.971044 |  | 1000 |
| Unit price ($/kg) | 0.948800 |  | 12.268200 |  | 592.215800 |  |  |
| Sum | 0.237119 |  | 7.816252 |  | 66.903237 |  | **74.957 $/kg** |
|  |  |  |  |  |  |  |  |
|  |  |  |  |  |  |  |  |
|  |  |  |  |  |  |  |  |
|  |  |  |  |  |  |  |  |
|  |  |  |  |  |  |  |  |
|  | 2.5 NaCl | + | 0.5 CrCl3 | + | 0.5 ZrCl4 | → | **Na2.5Cr0.5Zr0.5Cl6** |
|  | 146.099423 |  | 79.173050 |  | 116.512000 |  | 341.784473 |
| Mass (g) | 427.460680 |  | 231.646129 |  | 340.893192 |  | 1000 |
| Unit price ($/kg) | 0.948800 |  | 92.665900 |  | 12.268200 |  |  |
| Sum | 0.405575 |  | 21.465697 |  | 4.182146 |  | **26.053 $/kg** |
|  |  |  |  |  |  |  |  |
|  | NaOH | + | TaCl5 | → | HCl | + | **NaTaOCl4** |
|  | 39.996769 |  | 358.197880 |  |  |  | 361.736649 |
| Mass (g) | 110.568750 |  | 990.217277 |  |  |  | 1000 |
| Unit price ($/kg) | 1.533600 |  | 422.182300 |  |  |  |  |
| Sum | 0.169568 |  | 418.052208 |  |  |  | **418.221** **$/kg** |
|  |  |  |  |  |  |  |  |
|  | NaCl | + | 0.6 NbCl5 | + | 0.2 Nb2O5 | → | **NaNbCl4O** |
|  | 58.439769 |  | 162.093822 |  | 53.161548 |  | 273.695139 |
| Mass (g) | 213.521400 |  | 592.242239 |  | 194.236361 |  | 1000 |
| Unit price ($/kg) | 0.948800 |  | 138.931300 |  | 415.279000 |  |  |
| Sum | 0.202589 |  | 82.280984 |  | 80.662282 |  | **163.146** **$/kg** |
|  |  |  |  |  |  |  |  |
|  | 1.3 NaCl | + | ZrCl4 | + | 0.7 Na2O | → | **Na2.7ZrCl5.3O0.7** |
|  | 75.971700 |  | 233.024000 |  | 43.384977 |  | 352.380677 |
| Mass (g) | 215.595533 |  | 661.284841 |  | 123.119625 |  | 1000 |
| Unit price ($/kg) | 0.948800 |  | 12.268200 |  | 592.215800 |  |  |
| Sum | 0.204557 |  | 8.112775 |  | 72.913388 |  | **81.231 $/kg** |
|  |  |  |  |  |  |  |  |
|  | 2 NaCl | + | ZrCl4 | → | **Na2ZrCl6** | | |
|  | 116.879539 |  | 233.024000 |  |  | | |
| Mass (g) | 334.033600 |  | 665.966400 |  | 1000 | | |
| Unit price ($/kg) | 0.948800 |  | 12.268200 |  |  |  |  |
| Sum | 0.316931 |  | 8.170209 |  | **8.487 $/kg** | | |
|  |  |  |  |  |  |  |  |
|  | 0.625 NaCl | + | 0.25 YCl3 | + | 0.75 ZrCl4 | → | **Na0.625Y0.25Zr0.75Cl4.375** |
|  | 36.524856 |  | 48.813960 |  | 174.768000 |  | 260.106816 |
| Mass (g) | 140.422525 |  | 187.668900 |  | 671.908575 |  | 1000 |
| Unit price ($/kg) | 0.948800 |  | 295.318100 |  | 12.268200 |  |  |
| Sum | 0.133233 |  | 55.422023 |  | 8.243109 |  | **63.798 $/kg** |
|  |  |  |  |  |  |  |  |
|  | NaCl | + | TaCl5 | → | **NaTaCl6** | | |
|  | 58.439769 |  | 358.197880 |  | 416.637649 | | |
| Mass (g) | 140.265215 |  | 859.734785 |  | 1000 | | |
| Unit price ($/kg) | 0.948800 |  | 422.182300 |  |  | | |
| Sum | 0.133084 |  | 362.964809 |  | **363.098 $/kg** | | |
|  |  |  |  |  |  |  |  |
|  | 0.7 NaCl | + | 0.3 ZrCl4 | + | 0.7 LaCl3 | → | **Na0.7Zr0.3La0.7Cl4** |
|  | 40.907838 |  | 69.907200 |  | 171.678829 |  |  |
| Mass (g) | 144.809651 |  | 247.464487 |  | 607.725862 |  | 1000 |
| Unit price ($/kg) | 0.948800 |  | 12.268200 |  | 861.231700 |  |  |
| Sum | 0.137395 |  | 3.035944 |  | 523.392777 |  | **526.566 $/kg** |
|  |  |  |  |  |  |  |  |
|  |  |  |  |  |  |  |  |
|  |  |  |  |  |  |  |  |
|  | Na2O2 | + | HfCl4 | → | **Na2O2-HfCl4** | | |
|  | 77.977539 |  | 320.290000 |  | 398.267539 | | |
| Mass (g) | 195.791851 |  | 804.208149 |  | 1000 | | |
| Unit price ($/kg) | 59.963900 |  | 98.505400 |  |  | | |
| Sum | 11.740443 |  | 79.218845 |  | **90.959 $/kg** | | |
|  |  |  |  |  |  |  |  |
|  | Na2O2 | + | ZrCl4 | → | **Na2O2-ZrCl4** | | |
|  | 77.977539 |  | 233.024000 |  | 311.001539 | | |
| Mass (g) | 250.730395 |  | 749.269605 |  | 1000 | | |
| Unit price ($/kg) | 59.963900 |  | 12.268200 |  |  | | |
| Sum | 15.034772 |  | 9.192189 |  | **24.227 $/kg** | | |
|  |  |  |  |  |  |  |  |
|  | Na2O2 | + | TaCl5 | → | **Na2O2-TaCl5** | | |
|  | 77.977539 |  | 358.197880 |  | 436.175419 | | |
| Mass (g) | 178.775638 |  | 821.224362 |  | 1000 | | |
| Unit price ($/kg) | 59.963900 |  | 422.182300 |  |  | |  |
| Sum | 10.720084 |  | 346.706390 |  | **357.426 $/kg** | | |
|  |  |  |  |  |  |  |  |
|  | 2 Na2O | + | 2.5 ZrCl4 | + | 0.5 ZrF4 | → | **ZrO2-2Na2ZrCl5F** |
|  | 123.957077 |  | 582.560000 |  | 83.608806 |  | 790.125883 |
| Mass (g) | 156.882694 |  | 737.300236 |  | 105.817071 |  | 1000 |
| Unit price ($/kg) | 592.215800 |  | 12.268200 |  | 1286.174800 |  |  |
| Sum | 92.908410 |  | 9.045347 |  | 136.099250 |  | **238.053 $/kg** |
|  |  |  |  |  |  |  |  |
|  | NaCl | + | ZrCl4 | + | Na2CO3 | → | **Na3ZrCl5(CO3)** |
|  | 58.439769 |  | 233.024000 |  | 105.987539 |  | 397.451308 |
| Mass (g) | 147.036299 |  | 586.295718 |  | 266.667983 |  | 1000 |
| Unit price ($/kg) | 0.948800 |  | 12.268200 |  | 1.056500 |  |  |
| Sum | 0.139508 |  | 7.192793 |  | 0.281735 |  | **7.614 $/kg** |
